# Supplementary material for: Synthesis of Polyanionic Cellulose Carbamates by Homogeneous Aminolysis in an Ionic Liquid/DMF Medium
Source: MDPI journal article supplement (doi:10.3390/molecules27041384), 2022-02-18
Supplement: s1 [file s1]

## Supporting Information

### **Synthesis of Polyanionic Cellulose Carbamates by Homogeneous Aminolysis in an Ionic Liquid/DMF Medium**

Cuong Viet Bui<sup>1,2</sup>, Thomas Rosenau<sup>1,3</sup>, Hubert Hettegger<sup>1,\*</sup>

<sup>1</sup> Institute of Chemistry of Renewable Resources, Department of Chemistry, University of Natural Resources and Life Sciences, Vienna (BOKU), Konrad-Lorenz-Strasse 24, A-3430 Tulln, Austria

<sup>2</sup> Department of Food Technology, Faculty of Chemical Engineering, University of Science and Technology, The University of Danang, Danang City, 550000, Vietnam

<sup>3</sup> Johan Gadolin Process Chemistry Centre, Åbo Akademi University, Porthansgatan 3, FI-20500 Åbo, Finland

\* Correspondence: [hubert.hettegger@boku.ac.at](mailto:hubert.hettegger@boku.ac.at)

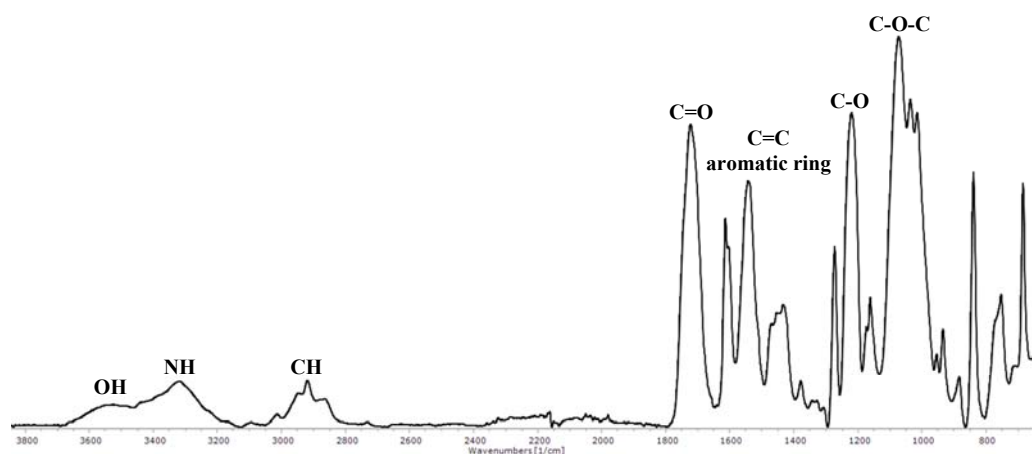

**Fig. S1.** FTIR spectrum of cellulose derivative **10**,  
 $\nu = 3529$  (OH), 3318 (NH), 2919 (CH), 1723 (C=O), 1614, 1543, 1434,  
 839 (C=C aromatic ring), 1220 (C-O), and 1073  $\text{cm}^{-1}$  (C-O-C).

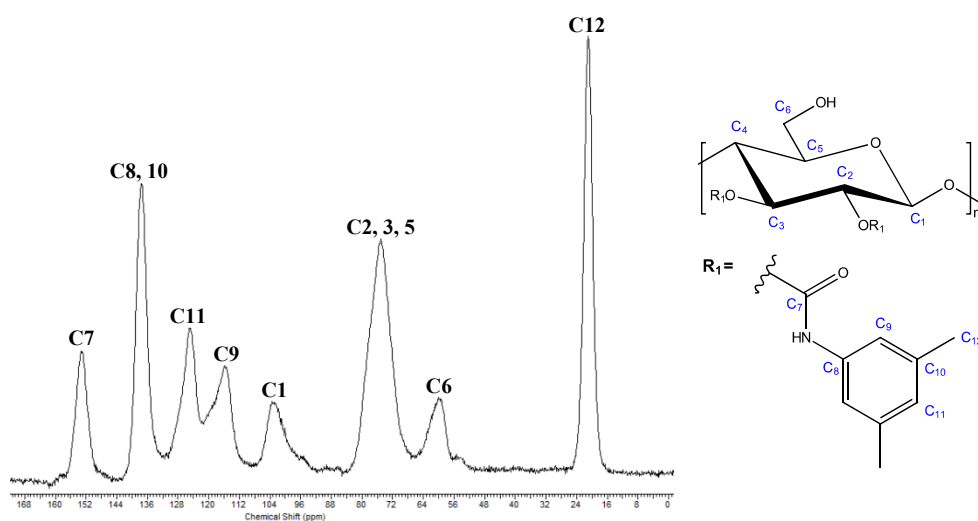

**Fig. S2.** Solid-state  $^{13}\text{C}$  NMR spectrum of cellulose derivative **10**,  
 $\delta = 103.5$  (C1), 75.1 (C2, 3, 5), 60.1 (C6), 153.3 (C7), 137.7 (C8, 10), 115.8 (C9),  
 125.0 (C11), and 21.0 ppm (C12).

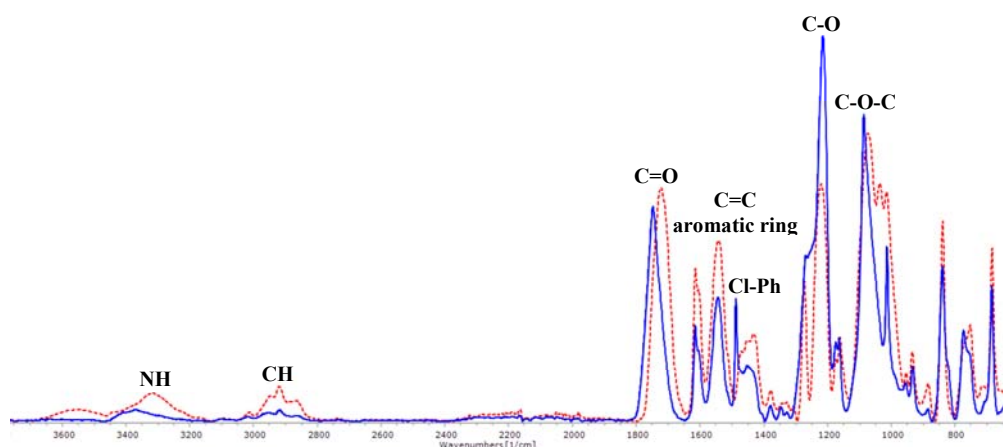

**Fig. S3.** FTIR spectra of cellulose derivatives **11b** (blue) vs. **10** (dashed red),  
Cellulose derivative **11b**:  $\nu$  = 3369 (NH), 2918 (CH), 1748 (C=O), 1615, 1543, 1447, 840  
(C=C aromatic ring), 1488 (Cl-Ph), 1215 (C-O), and 1087  $\text{cm}^{-1}$  (C-O-C).  
Solid-state  $^{13}\text{C}$  NMR of cellulose derivative **11b**:  $\delta$  = 101.5 (C1), 72.9 (C2, 3, 5), 67.0 (C6),  
151.7 (C7, 13), 137.9 (C8, 10), 115.5 (C9), 124.9 (C11, 15), 21.0 (C12), 149.4 (C14), and  
129.5 ppm (C16, 17).

Obtained: 26.06 g, yield: 97.3 %.

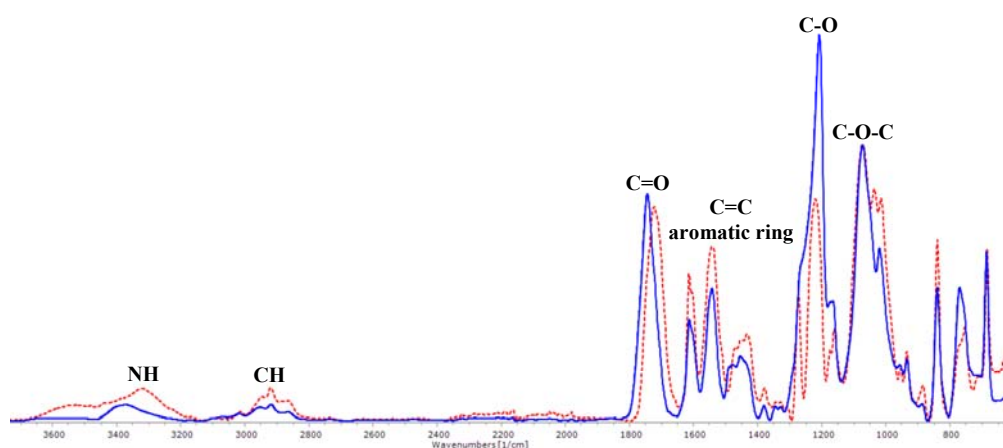

**Fig. S4.** FTIR spectra of cellulose derivatives **11c** (blue) vs. **10** (dashed red),  
Cellulose derivative **11c**:  $\nu$  = 3369 (NH), 2918 (CH), 1747 (C=O), 1613, 1543, 1454,  
840 (C=C aromatic ring), 1208 (C-O), and 1073  $\text{cm}^{-1}$  (C-O-C).

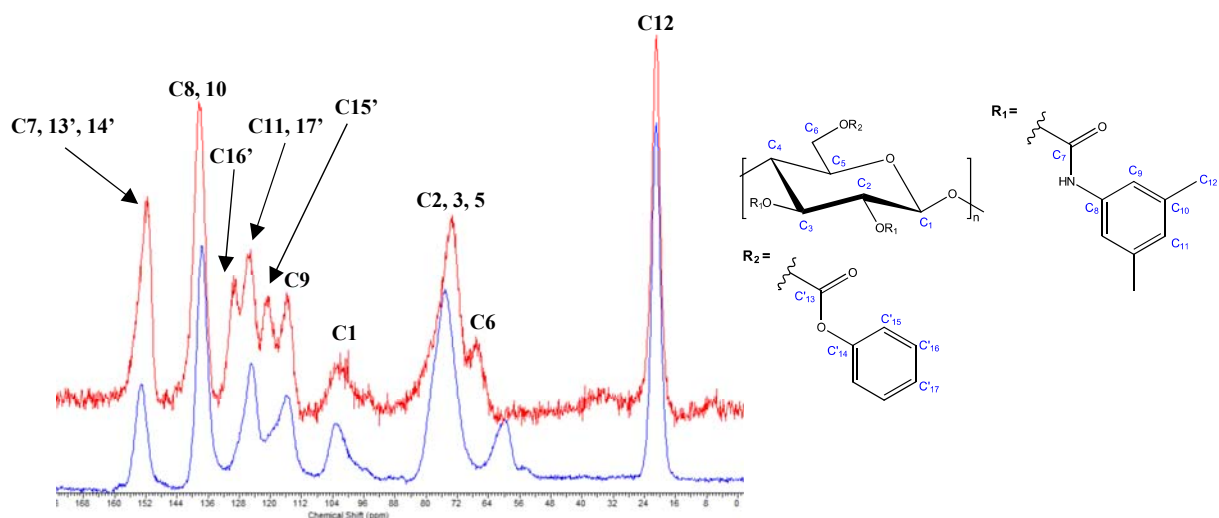

**Fig. S5.** Solid-state  $^{13}\text{C}$  NMR spectra of cellulose derivatives **11c** (red) vs. **10** (blue), Cellulose derivative **11c**:  $\delta = 102.1$  (C1), 73.2 (C2, 3, 5), 67.2 (C6), 151.6 (C7, 13', 14'), 138.3 (C8, 10), 115.8 (C9), 125.0 (11, 17'), 21 (C12), 120.7 (C15'), and 129.4 ppm (C16').

The chemical formula of cellulose derivative **11c** was  $\text{C}_{29.36}\text{H}_{29.21}\text{O}_{9.04}\text{N}_{1.84}$ , the DS of phenyl carbonate was calculated by the formula:

$$M_{\text{cellulose 6-O-(phenyl carbonate)-bis-2,3-O-(3,5-dimethylphenyl carbamate)}} =$$

$$M_{\text{cellulose 6-OH-bis-2,3-O-(3,5-dimethylphenyl carbamate)}} - M_{\text{H}} \times \text{DS} + \text{DS} \times \text{C}_7\text{H}_5\text{O}_2$$

Where M is the molar mass.

Obtained: 24.96 g, yield = 98.8 %.

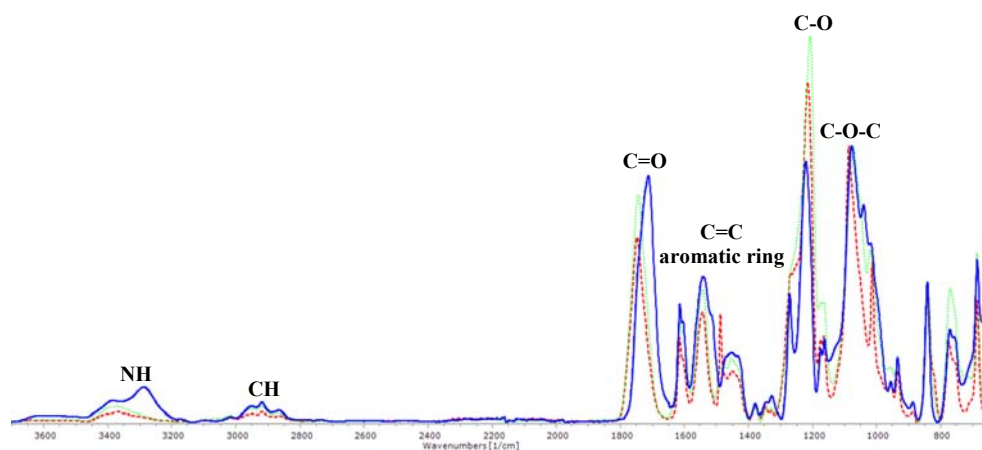

**Fig. S6.** FTIR spectrum of cellulose derivatives **12** (blue) vs. **11b** (dashed red) and cellulose derivative **11c** (dotted green),

Cellulose derivative **12**:  $\nu = 3384, 3287$  (NH),  $2919$  (CH),  $1713$  (C=O),  $1614, 1543, 1453, 841$  (C=C aromatic ring),  $1221$  (C-O), and  $1078\text{ cm}^{-1}$  (C-O-C).

Solid-state  $^{13}\text{C}$  NMR of cellulose derivative **12**:  $\delta = 102.1$  (C1),  $73.1$  (C2, 3, 5),  $62.8$  (C6),  $152.8$  (C7),  $138.3$  (C8, 10),  $115.4$  (C9),  $124.8$  (C11),  $21.1$  (C12),  $155.3$  (C13),  $30.8$  (C18),  $88.7$  (C19), and  $81.0$  ppm (C20).

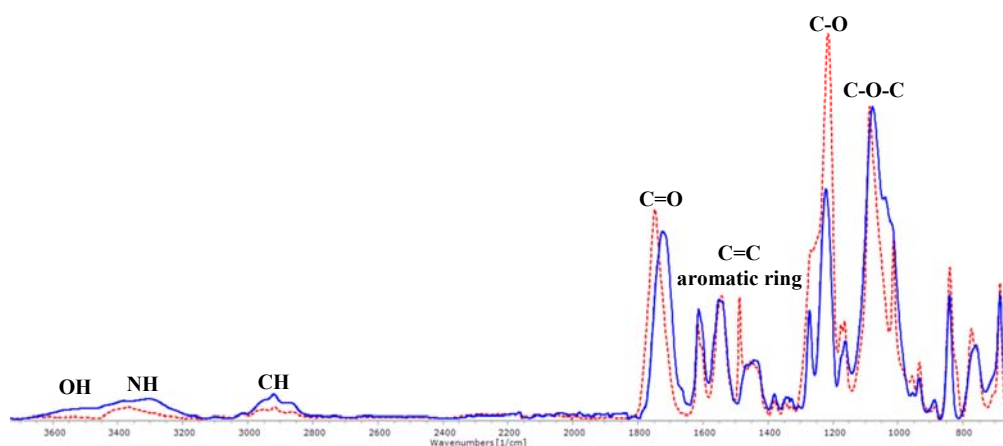

**Fig. S7.** FTIR spectra of cellulose derivatives **13aB** (blue) vs. **11b** (dashed red),

Cellulose derivative **13aB**:  $\nu = 3529$  (OH),  $3303, 3287$  (NH),  $2920$  (CH),  $1721$  (C=O),  $1615, 1543, 1433, 841$  (C=C aromatic ring),  $1220$  (C-O), and  $1075\text{ cm}^{-1}$  (C-O-C).

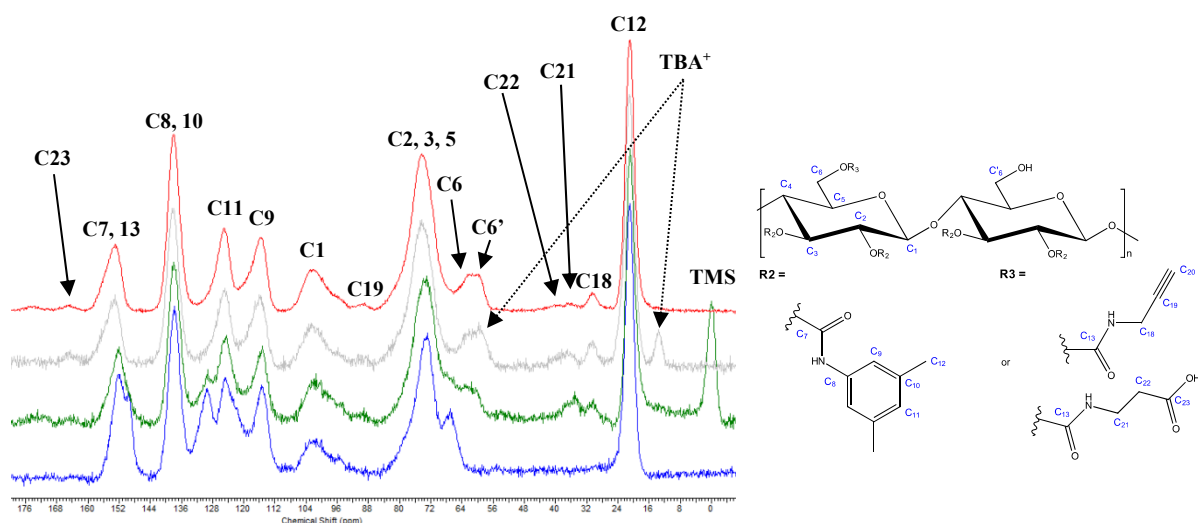

**Fig. S8.** Solid-state  $^{13}\text{C}$  NMR spectra of cellulose derivatives **13aB** (green: crude product, grey: after purification with TBAF, red: after purification and protonation with HCl 0.1 M) vs. **11b** (blue),

Solid-state  $^{13}\text{C}$  NMR of cellulose derivative **13aB**: 102.1 (C1), 74.4 (C2, 3, 5), 62.5 (C6), 59.9 (C6'), 153.0 (C7, 13), 138.0 (C8, 10), 115.7 (C9), 125.0 (C11), 21.0 (C12), 30.8 (C18), 88.9 (C19), 36 (C21), 39.7 (C22), and 174.7 ppm (C23).

Obtained: 2.32 g, yield: 83.9 %.

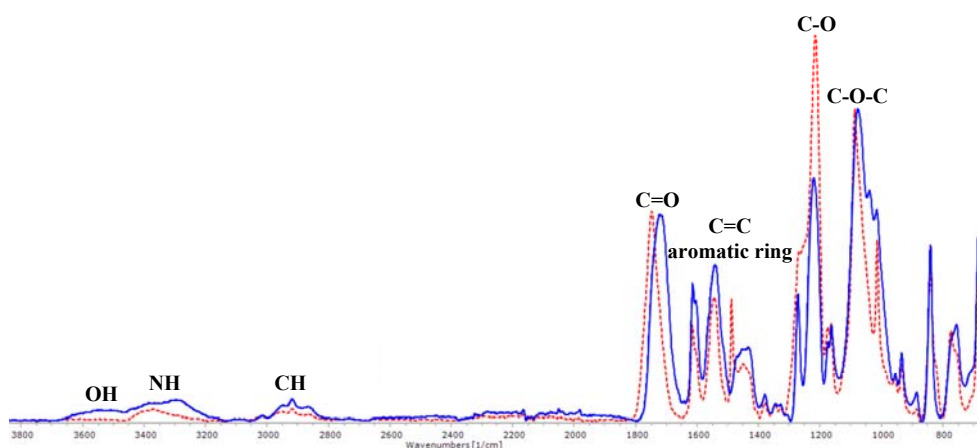

**Fig. S9.** FTIR spectra of cellulose derivatives **13bB** (blue) vs. **11b** (dashed red), Cellulose derivative **13bB**:  $\nu$  = 3529 (OH), 3296, 3287 (NH), 2918 (CH), 1722 (C=O), 1614, 1543, 1434, 840 (C=C aromatic ring), 1220 (C-O), and 1077  $\text{cm}^{-1}$  (C-O-C).

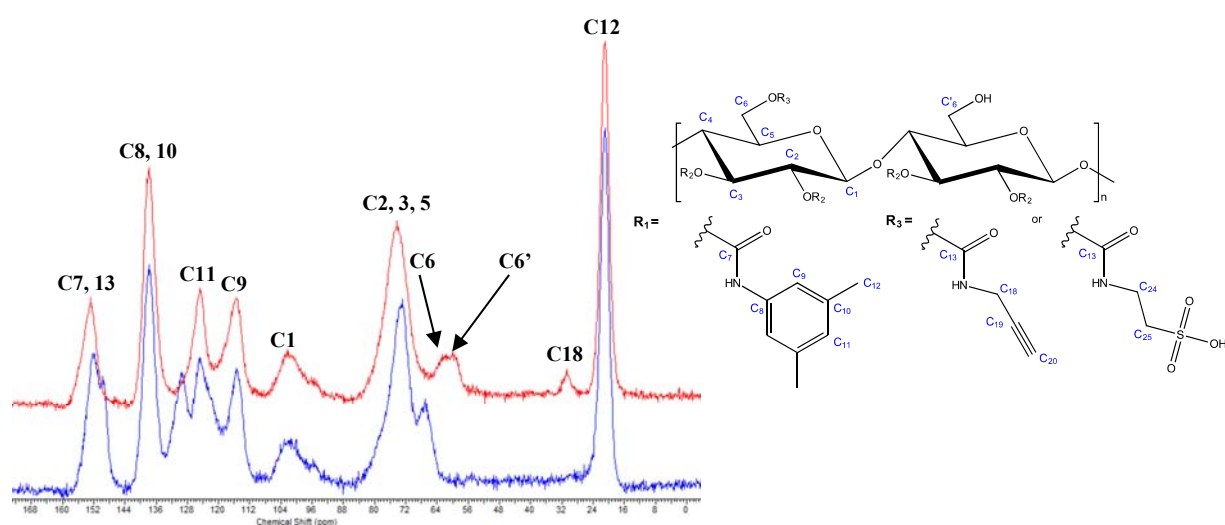

**Fig. S10.** Solid-state  $^{13}\text{C}$  NMR spectra of cellulose derivatives **13bB** (red) vs. **11b** (blue), Cellulose derivative **13bB**:  $\delta$  = 102.4 (C1), 74.2 (C2, 3, 5), 61.6 (C6), 59.9 (C6'), 152.8 (C7, 13), 137.9 (C8, 10), 115.4 (C9), 124.8 (C11), 20.8 (C12), and 30.8 ppm (C18).

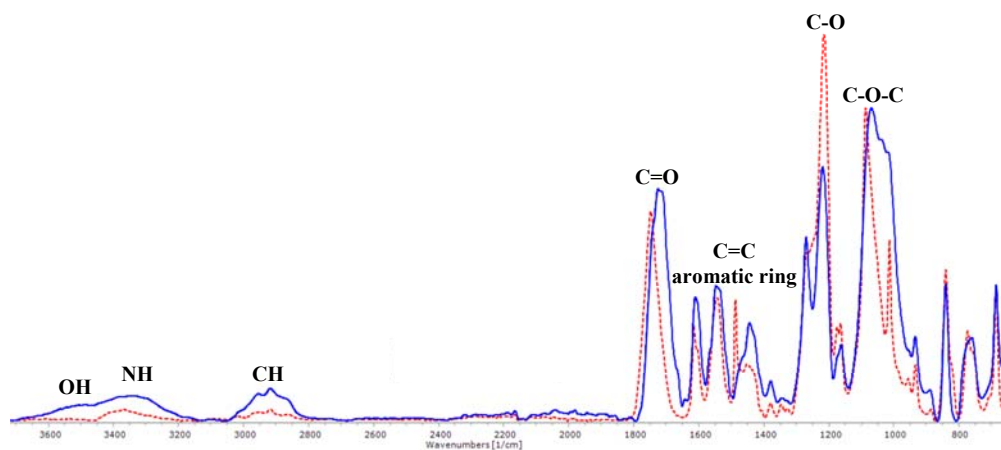

**Fig. S11.** FTIR spectra of cellulose derivatives **13aC** (blue) vs. **11b** (dashed red), Cellulose derivative **13aC**:  $\nu$  = 3520 (OH), 3339 (NH), 2918 (CH), 1725 (C=O), 1610, 1548, 1444, 840 (C=C aromatic ring), 1270 (unknown), 1219 (C-O), and 1070  $\text{cm}^{-1}$  (C-O-C).

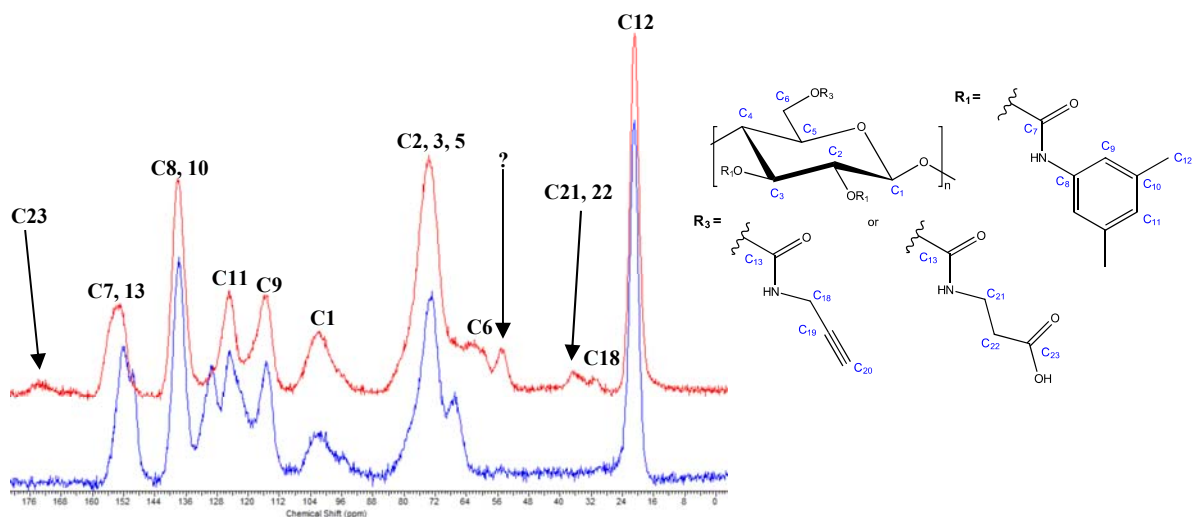

**Fig. S12.** Solid-state  $^{13}\text{C}$  NMR spectra of cellulose derivative **13aC** (red) vs. **11b** (blue),  
 Cellulose derivative **13aC**:  $\delta = 101.7$  (C1),  $73.7$  (C2, 3, 5),  $62.0$  (C6),  $152.8$  (C7, 13),  
 $138.2$  (C8, 10),  $115.9$  (C9),  $124.8$  (C11),  $20.8$  (C12),  $31.0$  (C18),  $36.4$  (C21, 22),  $173.8$  (C23),  
 and  $55.2$  ppm (unknown).  
 Obtained: 2.22 g, yield: 76.8 %.

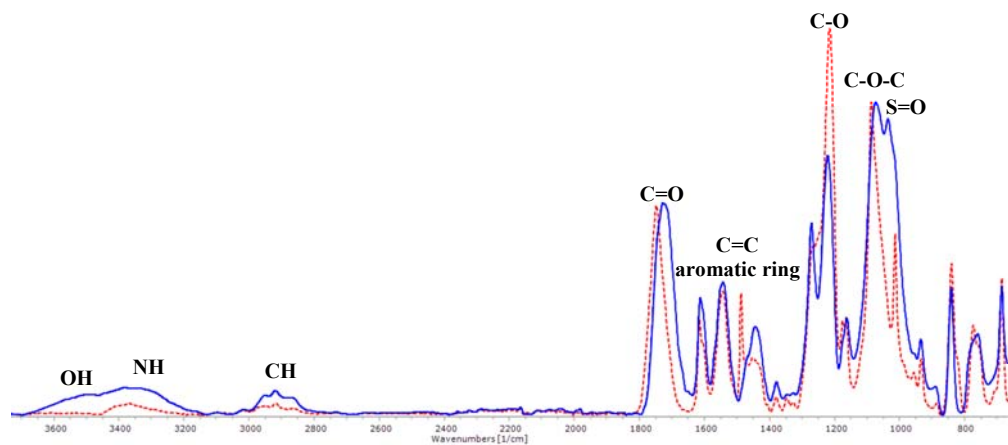

**Fig. S13.** FTIR spectra of cellulose derivatives **13bC** (blue) vs. **11b** (dashed red),  
 Cellulose derivative **13bC**:  $\nu = 3520$  (OH),  $3382$  (NH),  $2919$  (CH),  $1728$  (C=O),  $1613$ ,  
 $1543$ ,  $1444$ ,  $841$  (C=C aromatic ring),  $1270$  (unknown),  $1221$  (C-O),  $1073$  (C-O-C), and  
 $1035\text{ cm}^{-1}$  (S=O).



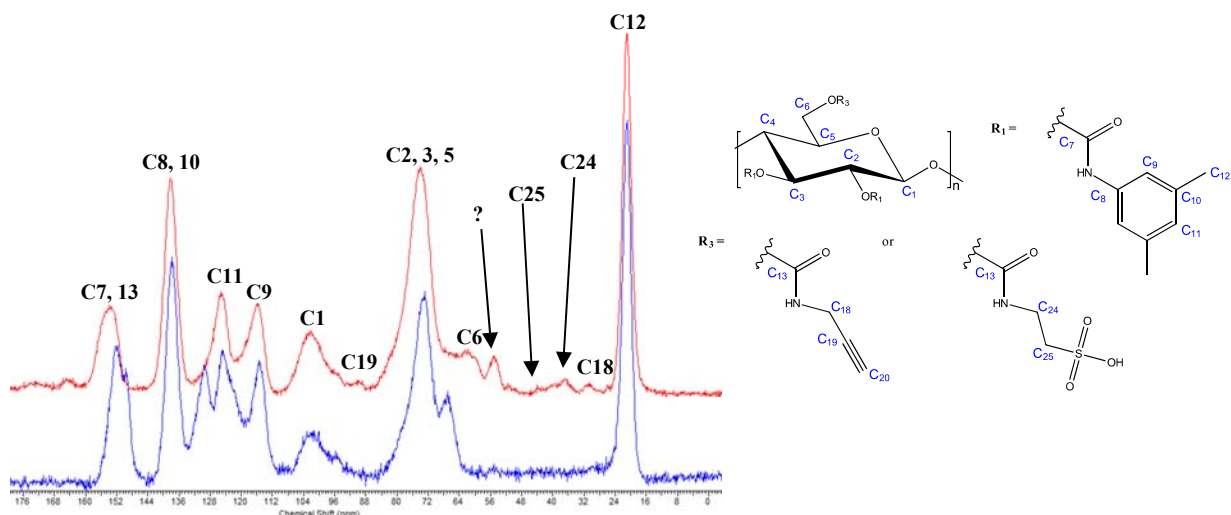

**Fig. S14.** Solid-state  $^{13}\text{C}$  NMR spectra of cellulose derivatives **13bC** (red) vs. **11b** (blue),  
 Cellulose derivative **13bC**:  $\delta = 102.4$  (C1),  $74.1$  (C2, 3, 5),  $61.8$  (C6),  $153.8$  (C7, 13),  
 $138.2$  (C8, 10),  $115.8$  (C9),  $125.2$  (C11),  $21.0$  (C12),  $30.3$  (C18),  $89.8$  (C19),  $36.8$  (C24),  
 $50.9$  (C25), and  $55.2$  ppm (unknown).  
 Obtained: 2.37 g, yield: 88.9 %.

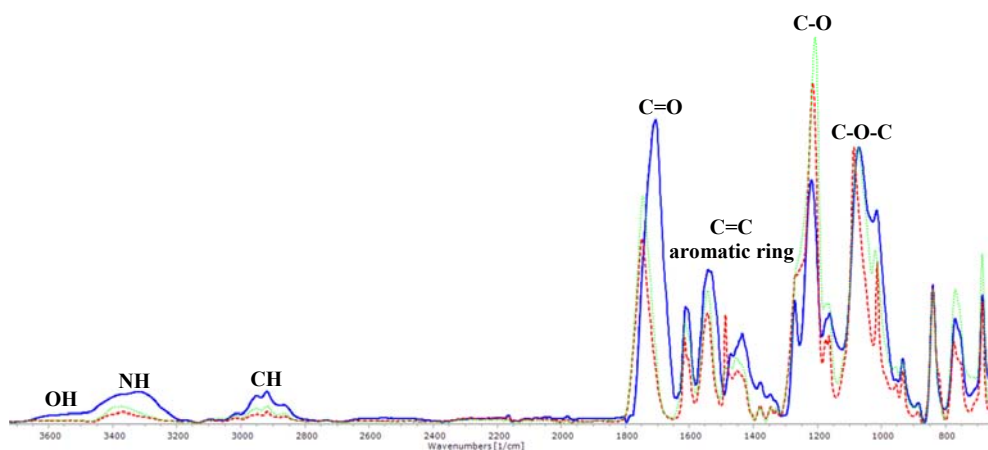

**Fig. S15.** FTIR spectra of cellulose derivative **13aD** (blue) vs. **11b** (dashed red) and **11c** (dotted green),

Cellulose derivative **13aD**:  $\nu = 3520$  (OH), 3378, 3313 (NH), 2919 (CH), 1708 (C=O), 1612, 1547, 1435, 840 (C=C aromatic ring), 1221 (C-O), and  $1071\text{ cm}^{-1}$  (C-O-C).

Solid-state  $^{13}\text{C}$  NMR of cellulose derivative **13aD**:  $\delta = 103.4$  (C1), 73.7 (C2, 3, 5), 62.5 (C6), 152.6 (C7), 138.2 (C8, 10), 115.7 (C9), 125.0 (C11), 21.0 (C12), 155.9 (C13), 36.8 (C21, 22), and 175.1 ppm (C23).

Obtained: 2.29 g, yield: 97.9 % with **11b** as a precursor.

Obtained: 2.37 g, yield: 95.6 % with **11c** as a precursor.

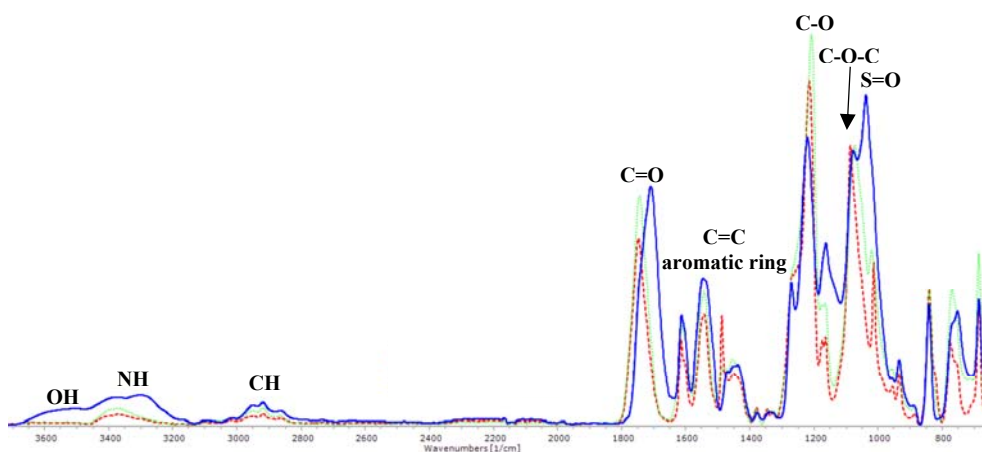

**Fig. S16.** FTIR spectra of cellulose derivative **13bD** (blue) vs. **11b** (dashed red) and **11c** (dotted green),

Cellulose derivative **13bD**:  $\nu$  = 3520 (OH), 3378, 3302 (NH), 2919 (CH), 1708 (C=O), 1613, 1546, 1438, 841 (C=C aromatic ring), 1221 (C-O), 1078 (C-O-C), and 1038  $\text{cm}^{-1}$  (S=O).

Solid-state  $^{13}\text{C}$  NMR of cellulose derivative **13bD**:  $\delta$  = 101.8 (C1), 73.7 (C2, 3, 5), 62.5 (C6), 153.3 (C7), 138.3 (C8, 10), 115.5 (C9), 125.2 (C11), 21.0 (C12), 156.7 (C13), 30.3 (C18), 37.0 (C24), 51.0 ppm (C25).

Obtained: 2.28 g, yield: 91.7 % with **11b** as a precursor

Obtained: 2.44 g, yield: 92.6 % with **11c** as a precursor.
